# Supplementary material for: Reduced SKP2 Expression Adversely Impacts Genome Stability and Promotes Cellular Transformation in Colonic Epithelial Cells
Source: MDPI journal article supplement (doi:10.3390/cells11233731), 2022-11-22
Supplement: s1 [file s1]

SUPPLEMENTARY INFORMATION

SUPPLEMENTARY FIGURES

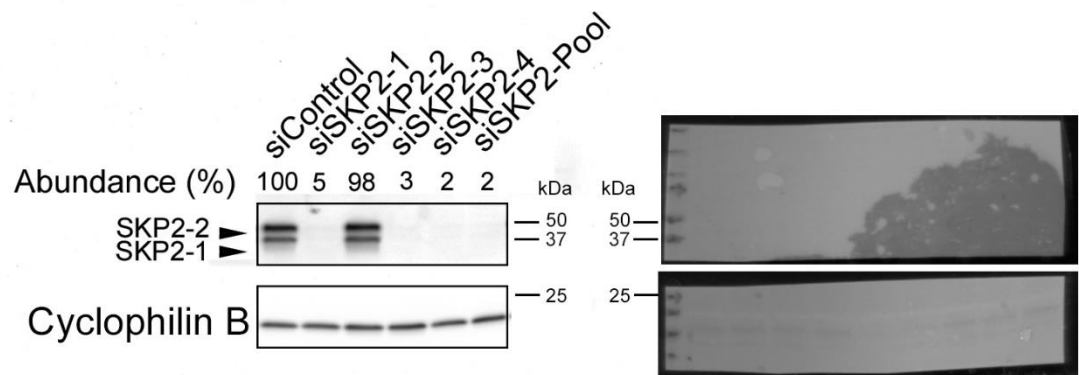

|             | SKP2  | Cyclophilin B | Ratio S/C | Norm. ratio |
|-------------|-------|---------------|-----------|-------------|
| siControl   | 84.01 | 63.39         | 1.33      | 100.00      |
| siSKP2-1    | 4.41  | 63.24         | 0.07      | 5.26        |
| siSKP2-2    | 93.32 | 71.53         | 1.30      | 98.45       |
| siSKP2-3    | 3.17  | 72.54         | 0.04      | 3.29        |
| siSKP2-4    | 1.91  | 62.48         | 0.03      | 2.30        |
| siSKP2-Pool | 2.08  | 69.36         | 0.03      | 2.26        |

**Figure S1: Raw data for western blot in Figure 3.**

Chemiluminescence (left) and visible light (right) images of the SKP2 and Cyclophilin B western blots shown in Figure 3A. Note that two bands representing the two SKP2 isoforms (SKP2-1 and SKP2-2; left labeling) are visible. Black rectangles highlight the cropped regions presented in Figure 3A. Densitometry analyses for SKP2 and Cyclophilin B were performed using Image J and are indicated. The ratio of SKP2/Cyclophilin B is shown for each lane, as are the normalized ratios, which are presented relative to the siControl.

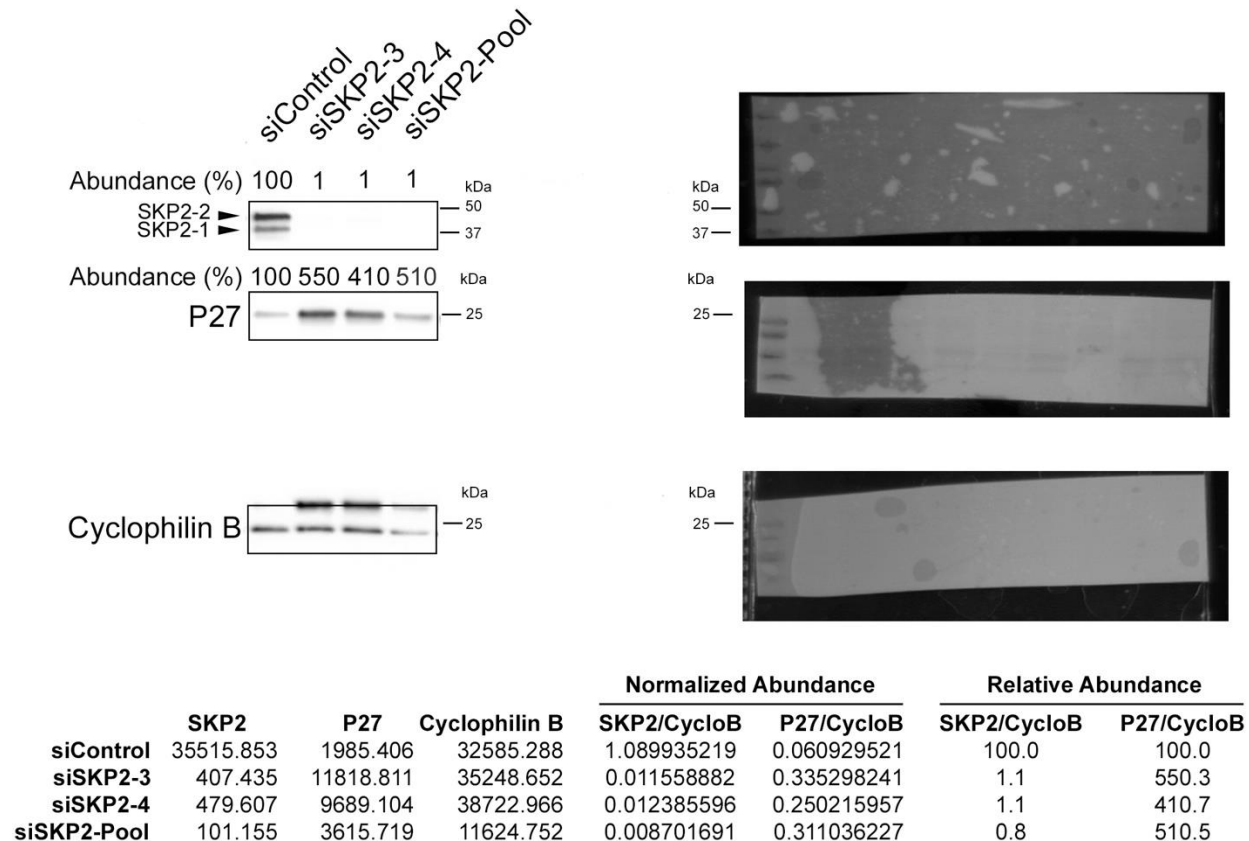

**Figure S2. Semi-quantitative western blot depicting SKP2 and P27 abundance following SKP2 silencing in HCT116 cells.**

Note that two bands representing the two SKP2 isoforms (SKP2-1 and SKP2-2; left labeling) are visible. Semi-quantitative analyses were performed whereby SKP2 and P27 abundance were first normalized to the respective loading control (Cyclophilin B) and are presented relative to siControl (100%). Densitometry analyses for SKP2, P27 and Cyclophilin B were performed using Fiji and are indicated. The relative abundance (%) of SKP2 and P27 are presented above each respective lane.

**A**

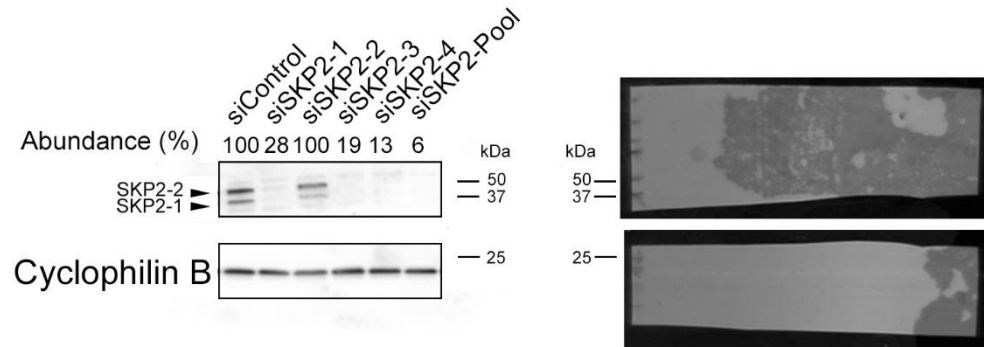

|             | SKP2  | Cyclophilin B | Ratio S/C | Norm. ratio |
|-------------|-------|---------------|-----------|-------------|
| siControl   | 69.14 | 79.82         | 0.87      | 100.00      |
| siSKP2-1    | 15.90 | 65.83         | 0.24      | 27.88       |
| siSKP2-2    | 51.13 | 59.27         | 0.86      | 99.59       |
| siSKP2-3    | 12.86 | 76.83         | 0.17      | 19.33       |
| siSKP2-4    | 9.03  | 78.78         | 0.11      | 13.24       |
| siSKP2-Pool | 3.70  | 74.03         | 0.05      | 5.77        |

**B**

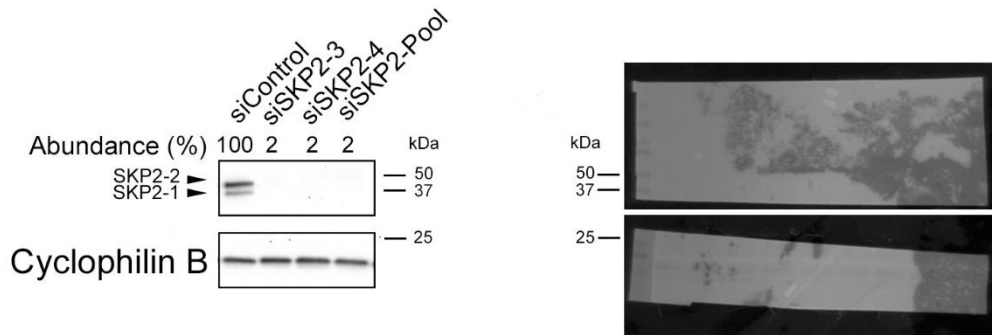

|             | SKP2  | Cyclophilin B | Ratio S/C | Norm. ratio |
|-------------|-------|---------------|-----------|-------------|
| siControl   | 51.05 | 60.09         | 0.85      | 100.00      |
| siSKP2-3    | 0.91  | 64.32         | 0.01      | 1.67        |
| siSKP2-4    | 0.92  | 70.23         | 0.01      | 1.55        |
| siSKP2-Pool | 1.11  | 59.92         | 0.02      | 2.17        |

**Figure S3: Raw data for western blots in Figure 5.**

Chemiluminescence (left) and visible light (right) images of the SKP2 and Cyclophilin B western blots shown in Figure 5A including 1CT (**A**) and A1309 (**B**). Black rectangles highlight the cropped regions shown in Figure 5A. Densitometry analyses for SKP2 and Cyclophilin B were performed using Image J and are indicated. The ratio of SKP2/Cyclophilin B is shown for each lane, as are the normalized ratios, which are presented relative to the siControl.

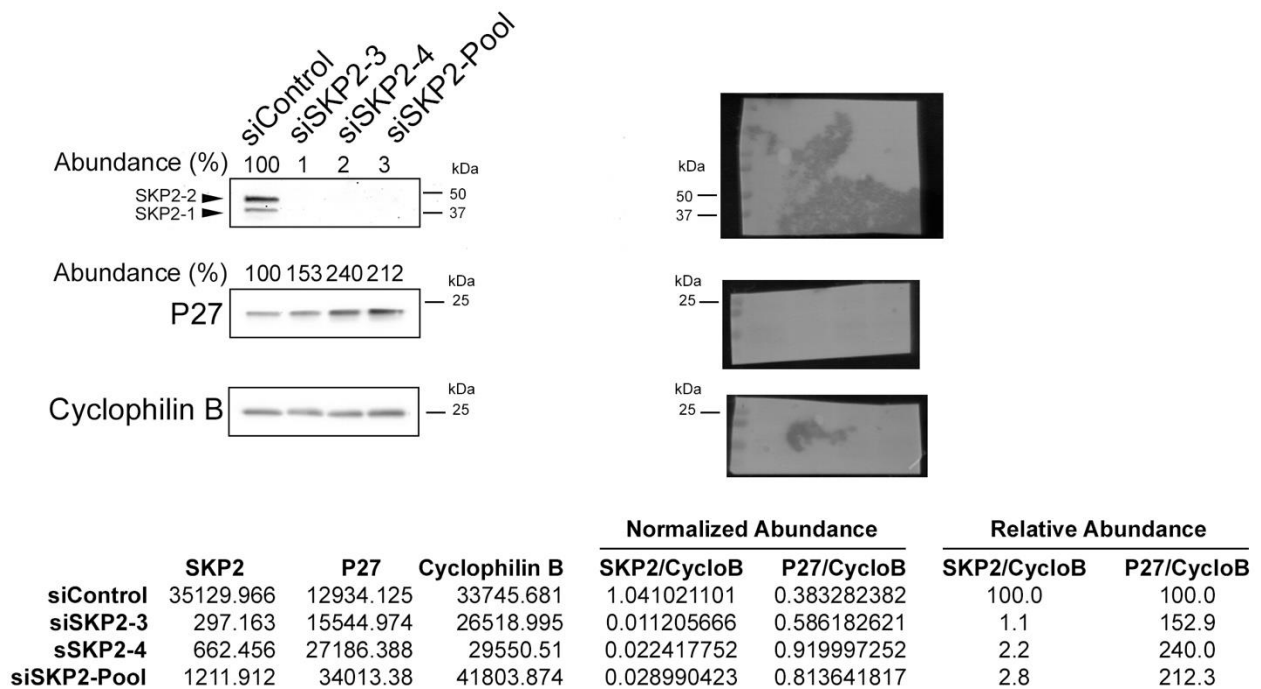

**Figure S4. Semi-quantitative western blot depicting SKP2 and P27 abundance following SKP2 silencing in A1309 cells.**

Note that two bands representing the two SKP2 isoforms (SKP2-1 and SKP2-2; left labeling) are visible. Semi-quantitative analyses were performed whereby SKP2 and P27 abundance were first normalized to the respective loading control (Cyclophilin B) and are presented relative to siControl (100%). Densitometry analyses for SKP2, P27 and Cyclophilin B were performed using Fiji and are indicated. The relative abundance (%) of SKP2 and P27 are presented above each respective lane.

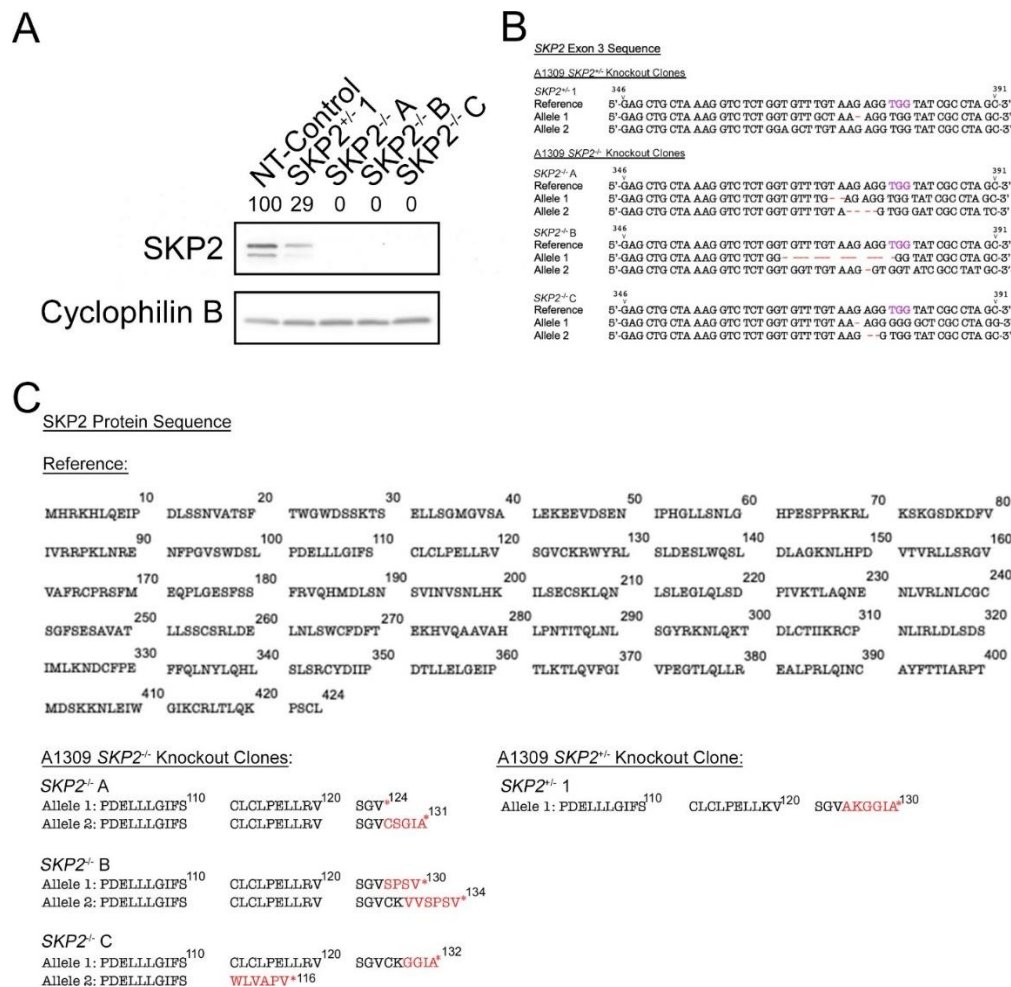

**Figure S5. DNA Sequencing Analyses Identifies *SKP2*<sup>+/-</sup> and *SKP2*<sup>-/-</sup> Knockout Clones in A1309.**

(A) Semi-quantitative western blots presenting the A1309 clones pursued in long-term CIN assays (p20). Decreased *SKP2* expression is presented relative to NT-Control (100%) with Cyclophilin B serving as the loading control. (B) DNA sequencing results for exon 3 of *SKP2* in one *SKP2*<sup>+/-</sup> clone and three *SKP2*<sup>-/-</sup> clones relative to the reference sequence (NM\_005983.4). Numbers indicate nucleotide position in the *SKP2* cDNA. PAM (purple font); protospacer adjacent motif. (C) Predicted amino acid alterations corresponding to DNA sequenced verified allele-specific edits following CRISPR/Cas9-mediated editing of *SKP2*. Numbers indicate amino acid position relative to the reference sequence (NM\_005974.2; top sequence). Red font identifies the divergent amino acids stemming from the CRISPR/Cas9 edits. All frameshift mutations are predicted to incorporate premature stop codons (\*) that are expected to induce nonsense-mediated mRNA decay.

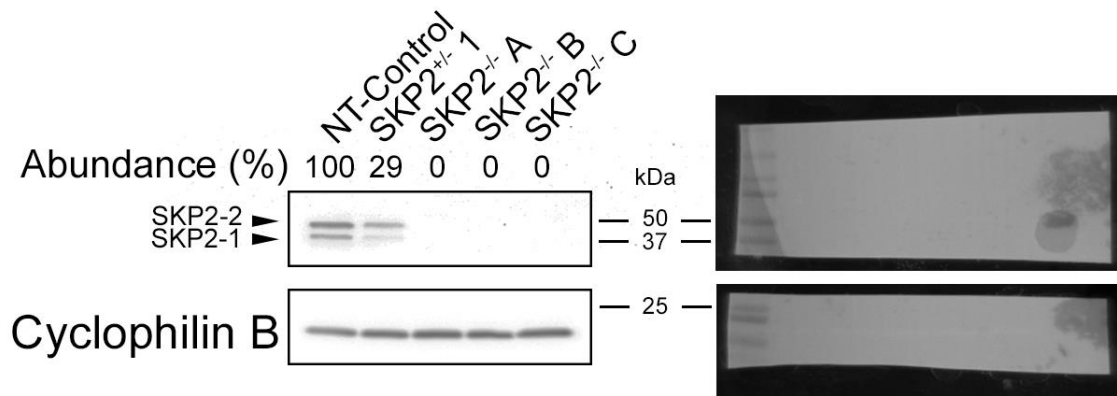

|                             | SKP2  | Cyclophilin B | Ratio S/C | Norm. ratio |
|-----------------------------|-------|---------------|-----------|-------------|
| NT-Control                  | 48.84 | 33.15         | 1.47      | 100.00      |
| <b>SKP2<sup>+/-</sup> 1</b> | 18.25 | 43.01         | 0.42      | 28.80       |
| <b>SKP2<sup>-/-</sup> A</b> | 0.06  | 51.41         | 0.00      | 0.08        |
| <b>SKP2<sup>-/-</sup> B</b> | 0.02  | 45.29         | 0.00      | 0.03        |
| <b>SKP2<sup>-/-</sup> C</b> | 0.04  | 52.89         | 0.00      | 0.06        |

**Figure S6: Raw data for western blot in Figure S5.**

Chemiluminescence (left) and visible light (right) images of the SKP2 and Cyclophilin B western blots shown in Figure S5A (p20). Black rectangles indicate cropped sections shown in Figure S5A. Densitometry analyses for SKP2 and Cyclophilin B were performed using Image J and are indicated. The ratio of SKP2/Cyclophilin B is shown for each lane, as are the normalized ratios, which are presented relative to NT-Control.

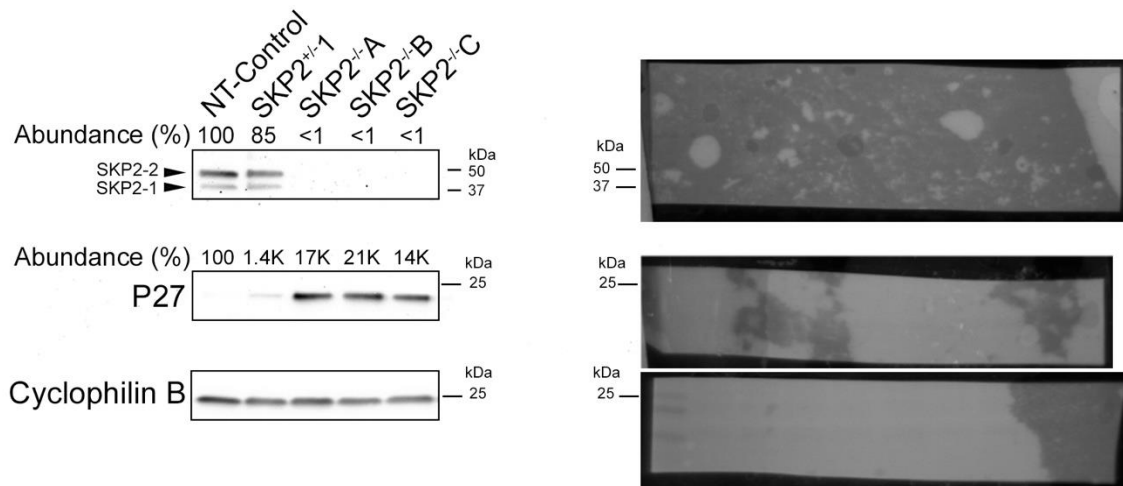

|                       |           |           |               | Normalized Abundance |             | Relative Abundance |            |
|-----------------------|-----------|-----------|---------------|----------------------|-------------|--------------------|------------|
|                       | SKP2      | P27       | Cyclophilin B | SKP2/CycloB          | P27/CycloB  | SKP2/CycloB        | P27/CycloB |
| NT-Control            | 35166.217 | 225.849   | 44352.459     | 0.792880886          | 0.005092142 | 100.0              | 100.0      |
| SKP2 <sup>+/+</sup>   | 23707.146 | 2552.912  | 35284.338     | 0.671888644          | 0.072352555 | 84.7               | 1420.9     |
| SKP2 <sup>-/-</sup> A | 91.607    | 34152.137 | 38924.51      | 0.002353453          | 0.877394141 | 0.3                | 17230.4    |
| SKP2 <sup>-/-</sup> B | 122.314   | 31519.874 | 28734.752     | 0.004256658          | 1.096925214 | 0.5                | 21541.5    |
| SKP2 <sup>-/-</sup> C | 169.849   | 24486.51  | 33329.874     | 0.005095999          | 0.734671544 | 0.6                | 14427.6    |

**Figure S7. Semi-quantitative western blot depicting SKP2 and P27 abundance in SKP2 clones.**

Note that two bands representing the two SKP2 isoforms (SKP2-1 and SKP2-2; left labeling) are visible. Semi-quantitative analyses were performed whereby SKP2 and P27 abundance were first normalized to the respective loading control (Cyclophilin B) and are presented relative to NT-Control (100%). Densitometry analyses for SKP2, P27 and Cyclophilin B were performed using Fiji and are indicated. The relative abundance (%) of SKP2 and P27 are presented above each respective lane.

## SUPPLEMENTARY TABLES

**Table S1. Antibodies and Dilutions for Western Blot Analyses**

| <b>Primary Antibodies</b>                |                           |                         |                |                 |
|------------------------------------------|---------------------------|-------------------------|----------------|-----------------|
| <b>Antibody</b>                          | <b>Source</b>             | <b>Catalogue Number</b> | <b>Species</b> | <b>Dilution</b> |
| SKP2                                     | Invitrogen                | 32-33190                | Mouse          | 1:500           |
| P27                                      | Abcam                     | ab32034                 | Rabbit         | 1:5000          |
| Cyclophilin B                            | Abcam                     | ab16045                 | Rabbit         | 1: 150,000      |
| <b>Secondary Antibodies</b>              |                           |                         |                |                 |
| Goat $\alpha$<br>Rabbit HRP <sup>A</sup> | Jackson<br>ImmunoResearch | 111-035 144             | Goat           | 1:10,000        |
| Goat $\alpha$<br>Mouse HRP               | Jackson<br>ImmunoResearch | 115-035-146             | Goat           | 1:10,000        |

<sup>A</sup>HRP (Horseradish peroxidase)



**Table S2. sgRNA Sequences and *SKP2* Target Sites.**

| sgRNA             | Sequence <sup>A</sup>         | Target Site        |
|-------------------|-------------------------------|--------------------|
| sgNT              | 5'-CGCGAUAGCGCGAAUAUAUU'3'    | None               |
| sg <i>SKP2</i> -1 | 5'-CCUGUCUGUGCCUCCCUGAGCUG-3' | <i>SKP2</i> Exon 3 |
| sg <i>SKP2</i> -2 | 5'-UCUCUGGUGUUUGUAAGAGGUGG-3' | <i>SKP2</i> Exon 3 |

<sup>A</sup>Each sgRNA is composed of a variable 20 nucleotide sequence at its 3' end (shown above), which either does not target any sequences in the human genome (sgNT) or targets a complementary region within *SKP2* (sg*SKP2*-1 or sg*SKP2*-2). A constant 82 nucleotide sequence at the 5' end of each sgRNA enables ribonucleoprotein complex formation with the Cas9: 5'UUUUUUCGUGGCUGAGCCACGGUGAAAAAGUUCAACUAUUGCCUGAUCGGAUAAAAUUGAACGAUAAAGAUCGAGAUUUUG3'.

**Table S3. Two-sample KS Tests Identify Significant Increases in Nuclear Area Distributions Following *SKP2* Silencing in HCT116**

| Condition   | n <sup>A</sup> | <i>p</i> -value <sup>B</sup> | Significance <sup>C</sup> | D-statistic <sup>D</sup> |
|-------------|----------------|------------------------------|---------------------------|--------------------------|
| siControl   | >1000          | -                            | -                         | -                        |
| siSKP2-3    | >1000          | <0.0001                      | ****                      | 0.2429                   |
| siSKP2-4    | >1000          | <0.0001                      | ****                      | 0.2804                   |
| siSKP2-Pool | >1000          | <0.0001                      | ****                      | 0.2385                   |

<sup>A</sup>Number of nuclei analyzed.

<sup>B</sup>*p*-values calculated from two-sample KS tests for the listed condition relative to non-targeting silencing control.

<sup>C</sup>Significance: \*\*\*\*, *p*-value <0.0001.

<sup>D</sup>D-statistic (maximum deviation between the two distribution curves).

**Table S4. MW Tests Fail to Identify Significant Increases in Micronucleus Formation Following *SKP2* Silencing in HCT116**

| Condition   | n <sup>A</sup> | Mean Nucleus Count <sup>B</sup> | Mean MN Count <sup>C</sup> | Mean% MNF <sup>D</sup> | Median Fold Change in MNF <sup>E</sup> | <i>p</i> -value <sup>F</sup> | Sig. <sup>G</sup> |
|-------------|----------------|---------------------------------|----------------------------|------------------------|----------------------------------------|------------------------------|-------------------|
| siControl   | 6              | 928                             | 20.3                       | 2.2                    | -                                      | -                            | -                 |
| siSKP2-3    | 6              | 742                             | 23.5                       | 2.8                    | 0.8                                    | 0.9372                       | ns                |
| siSKP2-4    | 6              | 786                             | 27.8                       | 3.4                    | 1.2                                    | 0.4848                       | ns                |
| siSKP2-Pool | 6              | 878                             | 32.3                       | 2.6                    | 1.4                                    | 0.9372                       | ns                |

<sup>A</sup>Number of nuclei analyzed.

<sup>B</sup>Mean number of nuclei analyzed per well.

<sup>C</sup>Mean number of micronuclei counted per well.

<sup>D</sup>Mean percent MNF (calculated for each well as the MN count / nucleus count × 100).

<sup>E</sup>Median fold change in MNF relative to non-targeting control.

<sup>F</sup>*p*-values calculated from two-sample MW tests for the listed condition relative to non-targeting control at the corresponding timepoint.

<sup>G</sup>Significance: ns, *p*-value >0.05

**Table S5. Student's t-tests Identify Significant Increases in the Frequency of Aberrant Chromosome Numbers in *SKP2* silenced HCT116 Cells**

| Condition   | n <sup>A</sup> | p-value <sup>B</sup> | Significance <sup>C</sup> |
|-------------|----------------|----------------------|---------------------------|
| siControl   | 300            | -                    | -                         |
| siSKP2-3    | 300            | 0.0041               | **                        |
| siSKP2-4    | 300            | 0.0048               | **                        |
| siSKP2-Pool | 300            | 0.0112               | *                         |

<sup>A</sup>Number of nuclei analyzed.

<sup>B</sup>*p*-values calculated from unpaired Student's T-Tests for the listed condition relative to non-targeting control.

<sup>C</sup>Significance: \*, *p*-value < 0.05; \*\*, *p*-value < 0.01

**Table S6. Two-sample KS Tests Reveal Significant Increases in Nuclear Area Distributions Following *SKP2* Silencing in 1CT and A1309 Cells**

| Condition    | n <sup>A</sup> | <i>p</i> -value <sup>B</sup> | Significance <sup>C</sup> | D-statistic <sup>D</sup> |
|--------------|----------------|------------------------------|---------------------------|--------------------------|
| <b>1CT</b>   |                |                              |                           |                          |
| siControl    | >1000          | -                            | -                         | -                        |
| siSKP2-3     | >1000          | <0.0001                      | ****                      | 0.2880                   |
| siSKP2-4     | >1000          | <0.0001                      | ****                      | 0.3659                   |
| siSKP2-Pool  | >1000          | <0.0001                      | ****                      | 0.2013                   |
| <b>A1309</b> |                |                              |                           |                          |
| siControl    | >1000          | -                            | -                         | -                        |
| siSKP2-3     | >1000          | <0.0001                      | ****                      | 0.7318                   |
| siSKP2-4     | >1000          | <0.0001                      | ****                      | 0.3913                   |
| siSKP2-Pool  | >1000          | <0.0001                      | ****                      | 0.4706                   |

<sup>A</sup>Number of nuclei analyzed.

<sup>B</sup>*p*-values calculated from two-sample KS tests for the listed condition relative to non-targeting silencing control.

<sup>C</sup>Significance: \*\*\*\*, *p*-value < 0.0001.

<sup>D</sup>D-statistic (maximum deviation between the two distribution curves).

**Table S7. MW Tests Reveal Increases in Micronucleus Formation Following *SKP2* Silencing in 1CT and A1309 Cells.**

| Condition    | n <sup>A</sup> | Mean Nucleus Count <sup>B</sup> | Mean MN Count <sup>C</sup> | Mean% MNF <sup>D</sup> | Median Fold Change in MNF <sup>E</sup> | p-value <sup>F</sup> | Sig. <sup>G</sup> |
|--------------|----------------|---------------------------------|----------------------------|------------------------|----------------------------------------|----------------------|-------------------|
| <b>1CT</b>   |                |                                 |                            |                        |                                        |                      |                   |
| siControl    | 6              | 521                             | 4.2                        | 0.8                    | -                                      | -                    | -                 |
| siSKP2-3     | 6              | 399                             | 4.7                        | 1.2                    | 1.9                                    | 0.3095               | ns                |
| siSKP2-4     | 6              | 324                             | 4.5                        | 1.4                    | 2.5                                    | 0.2403               | ns                |
| siSKP2-Pool  | 6              | 322                             | 4.3                        | 1.3                    | 2.3                                    | 0.1797               | ns                |
| <b>A1309</b> |                |                                 |                            |                        |                                        |                      |                   |
| siControl    | 6              | 904                             | 10.1                       | 1.1                    | -                                      | -                    | -                 |
| siSKP2-3     | 6              | 231                             | 8.0                        | 3.5                    | 1.7                                    | 0.1797               | ns                |
| siSKP2-4     | 6              | 595                             | 19.5                       | 3.4                    | 2.2                                    | < 0.0001             | ****              |
| siSKP2-Pool  | 6              | 484                             | 18.3                       | 3.9                    | 2.6                                    | 0.0043               | **                |

<sup>A</sup>Number of wells analyzed.

<sup>B</sup>Mean number of nuclei analyzed per well.

<sup>C</sup>Mean number of micronuclei counted per well.

<sup>D</sup>Mean percent MNF (calculated for each well as the MN count / nucleus count × 100).

<sup>E</sup>Median fold change in MNF relative to non-targeting control at the corresponding timepoint.

<sup>F</sup>p-values calculated from two-sample M-W tests for the listed condition relative to non-targeting silencing control at the corresponding timepoint.

<sup>G</sup>Significance: ns, p-value > 0.05; \*\*, p-value <0.01; \*\*\*\*, p-value <0.0001

**Table S8. Student's t-tests Identify Significant Increases in the Frequency of Aberrant Chromosome Numbers in *SKP2* silenced 1CT and A1309 Cells**

| Condition    | n <sup>A</sup> | p-value <sup>B</sup> | Significance <sup>C</sup> |
|--------------|----------------|----------------------|---------------------------|
| <b>1CT</b>   |                |                      |                           |
| siControl    | 300            | -                    | -                         |
| siSKP2-3     | 300            | 0.1028               | ns                        |
| siSKP2-4     | 300            | 0.0374               | *                         |
| siSKP2-Pool  | 300            | 0.1123               | ns                        |
| <b>A1309</b> |                |                      |                           |
| siControl    | 300            | -                    | -                         |
| siSKP2-3     | 300            | <0.0001              | ***                       |
| siSKP2-4     | 300            | 0.0293               | *                         |
| siSKP2-Pool  | 300            | 0.0646               | ns                        |

<sup>A</sup>Number of nuclei analyzed.

<sup>B</sup>*p*-values calculated from two-sample KS tests for the listed condition relative to non-targeting silencing control.

<sup>C</sup>Significance: ns, *p*-value > 0.05; \*, *p*-value < 0.05; \*\*\*, *p*-value < 0.001

**Table S9. Two-sample KS Tests Reveal Significant Changes in Nuclear Area Distributions in A1309 *SKP2*<sup>+/-</sup> and *SKP2*<sup>-/-</sup> Clones Over Time**

| Condition                    | n <sup>A</sup> | p-value <sup>B</sup> | Significance <sup>C</sup> | D-statistic <sup>D</sup> |
|------------------------------|----------------|----------------------|---------------------------|--------------------------|
| <b>p0</b>                    |                |                      |                           |                          |
| NT-Control                   | >1000          | -                    | -                         | -                        |
| <i>SKP2</i> <sup>+/-</sup> 1 | >1000          | <0.0001              | ****                      | 0.1536                   |
| <i>SKP2</i> <sup>-/-</sup> A | >1000          | <0.0001              | ****                      | 0.1660                   |
| <i>SKP2</i> <sup>-/-</sup> B | >1000          | <0.0001              | ****                      | 0.2786                   |
| <i>SKP2</i> <sup>-/-</sup> C | >1000          | <0.0001              | ****                      | 0.1762                   |
| <b>p4</b>                    |                |                      |                           |                          |
| NT-Control                   | >1000          | -                    | -                         | -                        |
| <i>SKP2</i> <sup>+/-</sup> 1 | >1000          | <0.0001              | ****                      | 0.1462                   |
| <i>SKP2</i> <sup>-/-</sup> A | >1000          | <0.0001              | ***                       | 0.0465                   |
| <i>SKP2</i> <sup>-/-</sup> B | >1000          | <0.0001              | ****                      | 0.1187                   |
| <i>SKP2</i> <sup>-/-</sup> C | >1000          | <0.0001              | ****                      | 0.0518                   |
| <b>p8</b>                    |                |                      |                           |                          |
| NT-Control                   | >1000          | -                    | -                         | -                        |
| <i>SKP2</i> <sup>+/-</sup> 1 | >1000          | <0.0001              | ****                      | 0.0513                   |
| <i>SKP2</i> <sup>-/-</sup> A | >1000          | <0.0001              | ****                      | 0.1129                   |
| <i>SKP2</i> <sup>-/-</sup> B | >1000          | <0.0001              | ****                      | 0.2564                   |
| <i>SKP2</i> <sup>-/-</sup> C | >1000          | <0.0001              | ****                      | 0.0731                   |
| <b>p12</b>                   |                |                      |                           |                          |
| NT-Control                   | >1000          | -                    | -                         | -                        |
| <i>SKP2</i> <sup>+/-</sup> 1 | >1000          | <0.0001              | ****                      | 0.1109                   |
| <i>SKP2</i> <sup>-/-</sup> A | >1000          | <0.0001              | ****                      | 0.0913                   |
| <i>SKP2</i> <sup>-/-</sup> B | >1000          | <0.0001              | ****                      | 0.2440                   |
| <i>SKP2</i> <sup>-/-</sup> C | >1000          | 0.0009               | ***                       | 0.0416                   |
| <b>p16</b>                   |                |                      |                           |                          |
| NT-Control                   | >1000          | -                    | -                         | -                        |
| <i>SKP2</i> <sup>+/-</sup> 1 | >1000          | <0.0001              | ****                      | 0.1040                   |
| <i>SKP2</i> <sup>-/-</sup> A | >1000          | <0.0001              | ****                      | 0.2082                   |
| <i>SKP2</i> <sup>-/-</sup> B | >1000          | <0.0001              | ****                      | 0.1698                   |
| <i>SKP2</i> <sup>-/-</sup> C | >1000          | <0.0001              | ****                      | 0.0629                   |
| <b>p20</b>                   |                |                      |                           |                          |
| NT-Control                   | >1000          | -                    | -                         | -                        |
| <i>SKP2</i> <sup>+/-</sup> 1 | >1000          | 0.2934               | ns                        | 0.0212                   |
| <i>SKP2</i> <sup>-/-</sup> A | >1000          | <0.0001              | ****                      | 0.1545                   |
| <i>SKP2</i> <sup>-/-</sup> B | >1000          | <0.0001              | ****                      | 0.2029                   |
| <i>SKP2</i> <sup>-/-</sup> C | >1000          | <0.0001              | ****                      | 0.1217                   |

<sup>A</sup>Number of nuclei analyzed.

<sup>B</sup>p-values calculated from two-sample KS tests for the listed condition relative to non-targeting control.

<sup>C</sup>Significance: ns, p-value > 0.05; \*\*\*, p-value < 0.001; \*\*\*\*, p-value < 0.0001.

<sup>D</sup>D-statistic (maximum deviation between the two distribution curves).



**Table S10. Statistical Assessment of Micronuclei within *SKP2*<sup>+/-</sup> and *SKP2*<sup>-/-</sup> Models Over Time**

| Condition                    | n <sup>A</sup> | Mean Nucleus Count <sup>B</sup> | Mean MN Count <sup>C</sup> | Mean% MNF <sup>D</sup> | Median Fold Change in MNF <sup>E</sup> | p-value <sup>F</sup> | Sig. <sup>G</sup> |
|------------------------------|----------------|---------------------------------|----------------------------|------------------------|----------------------------------------|----------------------|-------------------|
| <b>p0</b>                    |                |                                 |                            |                        |                                        |                      |                   |
| NT-Control                   | 6              | 624                             | 17.0                       | 2.7                    | -                                      | -                    | -                 |
| <i>SKP2</i> <sup>+/-</sup> 1 | 6              | 603                             | 30.2                       | 5.0                    | 1.6                                    | 0.0087               | **                |
| <i>SKP2</i> <sup>-/-</sup> A | 6              | 530                             | 19.7                       | 3.7                    | 1.1                                    | 0.3939               | ns                |
| <i>SKP2</i> <sup>-/-</sup> B | 6              | 464                             | 37.2                       | 8.0                    | 3.0                                    | 0.0087               | **                |
| <i>SKP2</i> <sup>-/-</sup> C | 6              | 506                             | 20.5                       | 4.1                    | 1.2                                    | 0.2403               | ns                |
| <b>p4</b>                    |                |                                 |                            |                        |                                        |                      |                   |
| NT-Control                   | 6              | 647                             | 1.3                        | 0.2                    | -                                      | -                    | -                 |
| <i>SKP2</i> <sup>+/-</sup> 1 | 6              | 474                             | 5.8                        | 1.1                    | 6.8                                    | 0.0043               | **                |
| <i>SKP2</i> <sup>-/-</sup> A | 6              | 681                             | 23.0                       | 3.4                    | 26.0                                   | 0.0022               | **                |
| <i>SKP2</i> <sup>-/-</sup> B | 6              | 680                             | 36.2                       | 5.3                    | 25.8                                   | 0.0022               | **                |
| <i>SKP2</i> <sup>-/-</sup> C | 6              | 714                             | 14.7                       | 2.1                    | 13.9                                   | 0.0022               | **                |
| <b>p8</b>                    |                |                                 |                            |                        |                                        |                      |                   |
| NT-Control                   | 6              | 714                             | 6.3                        | 0.9                    | -                                      | -                    | -                 |
| <i>SKP2</i> <sup>+/-</sup> 1 | 6              | 713                             | 17.0                       | 2.5                    | 2.2                                    | 0.0022               | **                |
| <i>SKP2</i> <sup>-/-</sup> A | 6              | 622                             | 13                         | 2.1                    | 2.4                                    | 0.0043               | **                |
| <i>SKP2</i> <sup>-/-</sup> B | 6              | 569                             | 22.5                       | 4.4                    | 5.3                                    | 0.0022               | **                |
| <i>SKP2</i> <sup>-/-</sup> C | 6              | 610                             | 19                         | 3.1                    | 3.4                                    | 0.0043               | **                |
| <b>p12</b>                   |                |                                 |                            |                        |                                        |                      |                   |
| NT-Control                   | 6              | 761                             | 3.7                        | 0.5                    | -                                      | -                    | -                 |
| <i>SKP2</i> <sup>+/-</sup> 1 | 6              | 591                             | 6.7                        | 1.1                    | 2.3                                    | 0.0411               | *                 |
| <i>SKP2</i> <sup>-/-</sup> A | 6              | 473                             | 3.5                        | 0.8                    | 1.0                                    | 0.8182               | ns                |
| <i>SKP2</i> <sup>-/-</sup> B | 6              | 535                             | 12.7                       | 2.5                    | 4.4                                    | 0.0022               | **                |
| <i>SKP2</i> <sup>-/-</sup> C | 6              | 720                             | 9.8                        | 1.3                    | 2.5                                    | 0.0649               | ns                |
| <b>p16</b>                   |                |                                 |                            |                        |                                        |                      |                   |
| NT-Control                   | 6              | 806                             | 7.7                        | 1.0                    | -                                      | -                    | -                 |
| <i>SKP2</i> <sup>+/-</sup> 1 | 6              | 748                             | 18.0                       | 2.4                    | 2.8                                    | 0.0022               | **                |
| <i>SKP2</i> <sup>-/-</sup> A | 6              | 516                             | 10.7                       | 2.1                    | 2.0                                    | 0.0931               | ns                |
| <i>SKP2</i> <sup>-/-</sup> B | 6              | 766                             | 22.0                       | 2.9                    | 3.3                                    | 0.0022               | **                |
| <i>SKP2</i> <sup>-/-</sup> C | 6              | 786                             | 15.7                       | 2.0                    | 2.2                                    | 0.0022               | **                |
| <b>p20</b>                   |                |                                 |                            |                        |                                        |                      |                   |
| NT-Control                   | 6              | 727                             | 8.0                        | 1.1                    | -                                      | -                    | -                 |
| <i>SKP2</i> <sup>+/-</sup> 1 | 6              | 720                             | 12.2                       | 1.7                    | 1.6                                    | 0.0931               | ns                |
| <i>SKP2</i> <sup>-/-</sup> A | 6              | 533                             | 12.5                       | 2.4                    | 2.1                                    | 0.0260               | *                 |
| <i>SKP2</i> <sup>-/-</sup> B | 6              | 627                             | 19.2                       | 3.1                    | 3.0                                    | 0.0022               | **                |
| <i>SKP2</i> <sup>-/-</sup> C | 6              | 689                             | 10.2                       | 1.5                    | 1.3                                    | 0.0931               | ns                |

<sup>A</sup>Number of wells analyzed.

<sup>B</sup>Mean number of nuclei analyzed per well.

<sup>C</sup>Mean number of micronuclei counted per well.

<sup>D</sup>Mean percent MNF (calculated for each well as the MN count / nucleus count  $\times$  100).

<sup>E</sup>Median fold change in MNF relative to non-targeting control at the corresponding timepoint.

<sup>F</sup>p-values calculated from two-sample MW tests for the listed condition relative to non-targeting control at the corresponding timepoint.

<sup>G</sup>Significance: ns, p-value  $>$  0.05; \*, p-value  $<$  0.05; \*\*, p-value  $<$  0.01.

**Table S11. Statistical Assessment of Chromosome Numbers Within *SKP2*<sup>+/-</sup> and *SKP2*<sup>-/-</sup> Clones Over Time**

| Condition                    | n <sup>A</sup> | Fold Change<br>in Aberrant<br>Spreads | p-value <sup>B</sup> | Significance <sup>C</sup> | D-statistic <sup>D</sup> |
|------------------------------|----------------|---------------------------------------|----------------------|---------------------------|--------------------------|
| <b>p0</b>                    |                |                                       |                      |                           |                          |
| NT-Control                   | 100            | -                                     | -                    | -                         | -                        |
| <i>SKP2</i> <sup>+/-</sup> 1 | 100            | 4.9                                   | 0.0023               | **                        | 0.2600                   |
| <i>SKP2</i> <sup>-/-</sup> A | 100            | 3.8                                   | 0.0541               | ns                        | 0.1900                   |
| <i>SKP2</i> <sup>-/-</sup> B | 100            | 4.0                                   | 0.0243               | *                         | 0.2100                   |
| <i>SKP2</i> <sup>-/-</sup> C | 100            | 4.4                                   | <0.0001              | ****                      | 0.3500                   |
| <b>p4</b>                    |                |                                       |                      |                           |                          |
| NT-Control                   | 100            | -                                     | -                    | -                         | -                        |
| <i>SKP2</i> <sup>+/-</sup> 1 | 100            | 2.7                                   | 0.2106               | ns                        | 0.1500                   |
| <i>SKP2</i> <sup>-/-</sup> A | 100            | 2.3                                   | 0.0541               | ns                        | 0.1900                   |
| <i>SKP2</i> <sup>-/-</sup> B | 100            | 2.3                                   | 0.0783               | ns                        | 0.1800                   |
| <i>SKP2</i> <sup>-/-</sup> C | 100            | 2.9                                   | 0.0366               | *                         | 0.2000                   |
| <b>p8</b>                    |                |                                       |                      |                           |                          |
| NT-Control                   | 100            | -                                     | -                    | -                         | -                        |
| <i>SKP2</i> <sup>+/-</sup> 1 | 100            | 1.4                                   | 0.9671               | ns                        | 0.0700                   |
| <i>SKP2</i> <sup>-/-</sup> A | 100            | 0.7                                   | >0.9999              | ns                        | 0.0300                   |
| <i>SKP2</i> <sup>-/-</sup> B | 100            | 1.9                                   | 0.9996               | ns                        | 0.0500                   |
| <i>SKP2</i> <sup>-/-</sup> C | 100            | 1.5                                   | 0.9996               | ns                        | 0.0500                   |
| <b>p12</b>                   |                |                                       |                      |                           |                          |
| NT-Control                   | 100            | -                                     | -                    | -                         | -                        |
| <i>SKP2</i> <sup>+/-</sup> 1 | 100            | 0.5                                   | 0.9938               | ns                        | 0.0600                   |
| <i>SKP2</i> <sup>-/-</sup> A | 100            | 1.8                                   | 0.9671               | ns                        | 0.0700                   |
| <i>SKP2</i> <sup>-/-</sup> B | 100            | 1.6                                   | 0.6994               | ns                        | 0.1000                   |
| <i>SKP2</i> <sup>-/-</sup> C | 100            | 1.6                                   | 0.5806               | ns                        | 0.1100                   |
| <b>p16</b>                   |                |                                       |                      |                           |                          |
| NT-Control                   | 100            | -                                     | -                    | -                         | -                        |
| <i>SKP2</i> <sup>+/-</sup> 1 | 100            | 3.1                                   | 0.0158               | *                         | 0.2200                   |
| <i>SKP2</i> <sup>-/-</sup> A | 100            | 1.8                                   | 0.6994               | ns                        | 0.1000                   |
| <i>SKP2</i> <sup>-/-</sup> B | 100            | 2.4                                   | 0.0783               | ns                        | 0.1800                   |
| <i>SKP2</i> <sup>-/-</sup> C | 100            | 2.9                                   | 0.0541               | ns                        | 0.1900                   |
| <b>p20</b>                   |                |                                       |                      |                           |                          |
| NT-Control                   | 100            | -                                     | -                    | -                         | -                        |
| <i>SKP2</i> <sup>+/-</sup> 1 | 100            | 1.5                                   | 0.9938               | ns                        | 0.0600                   |
| <i>SKP2</i> <sup>-/-</sup> A | 100            | 1.8                                   | 0.0541               | ns                        | 0.1900                   |
| <i>SKP2</i> <sup>-/-</sup> B | 100            | 1.0                                   | >0.9999              | ns                        | 0.0300                   |
| <i>SKP2</i> <sup>-/-</sup> C | 100            | 0.9                                   | >0.9999              | ns                        | 0.0400                   |

<sup>A</sup>Number of MCS analyzed.

<sup>B</sup>p-values calculated from two-sample KS tests for the listed condition relative to non-targeting control.

<sup>C</sup>Significance: ns, p-value > 0.05; \*, p-value < 0.05; \*\*, p-value < 0.01; \*\*\*\*, p-value < 0.0001.

<sup>D</sup>D-statistic (maximum deviation between the two distribution curves).
